# Supplementary material for: Tyrosine phosphorylation regulates ERβ ubiquitination, protein turnover, and inhibition of breast cancer
Source: PubMed Central journal article supplement (PMC5173158; doi:10.18632/oncotarget.10018), 2016-06-14
Supplement: oncotarget-07-42585-s001.pdf [file oncotarget-07-42585-s001.pdf]

## Tyrosine phosphorylation regulates ER $\beta$ ubiquitination, protein turnover, and inhibition of breast cancer

### SUPPLEMENTARY FIGURES

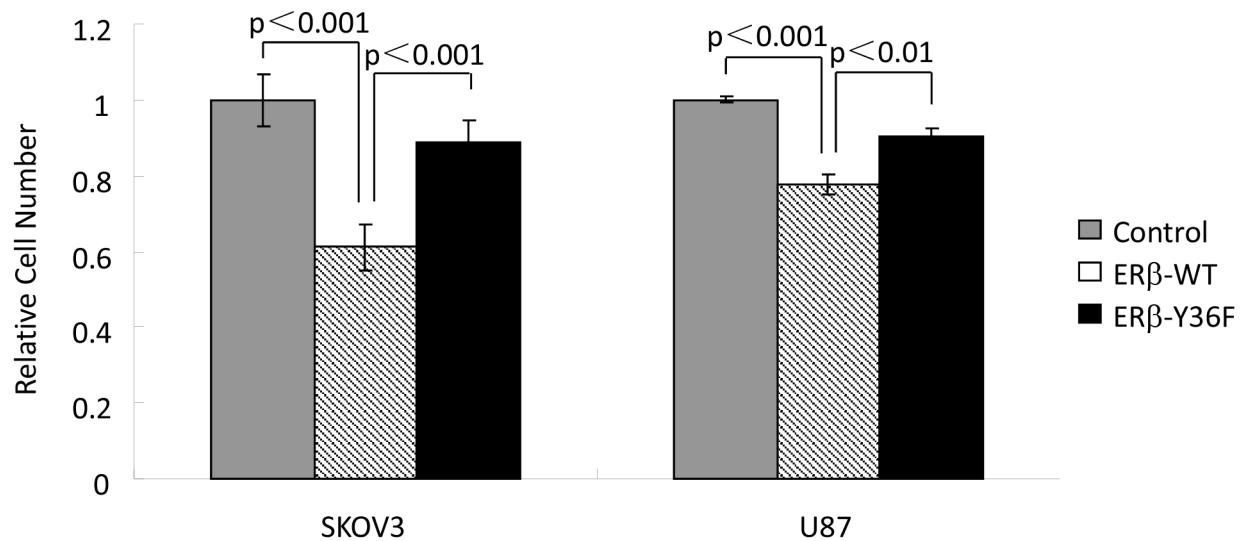

Supplementary Figure S1: MTT-based *in vitro* growth assay of SKOV3 ovarian cancer cells and U87 glioma cells transfected with vector alone, WT ER $\beta$ , and Y36F mutant ER $\beta$ .

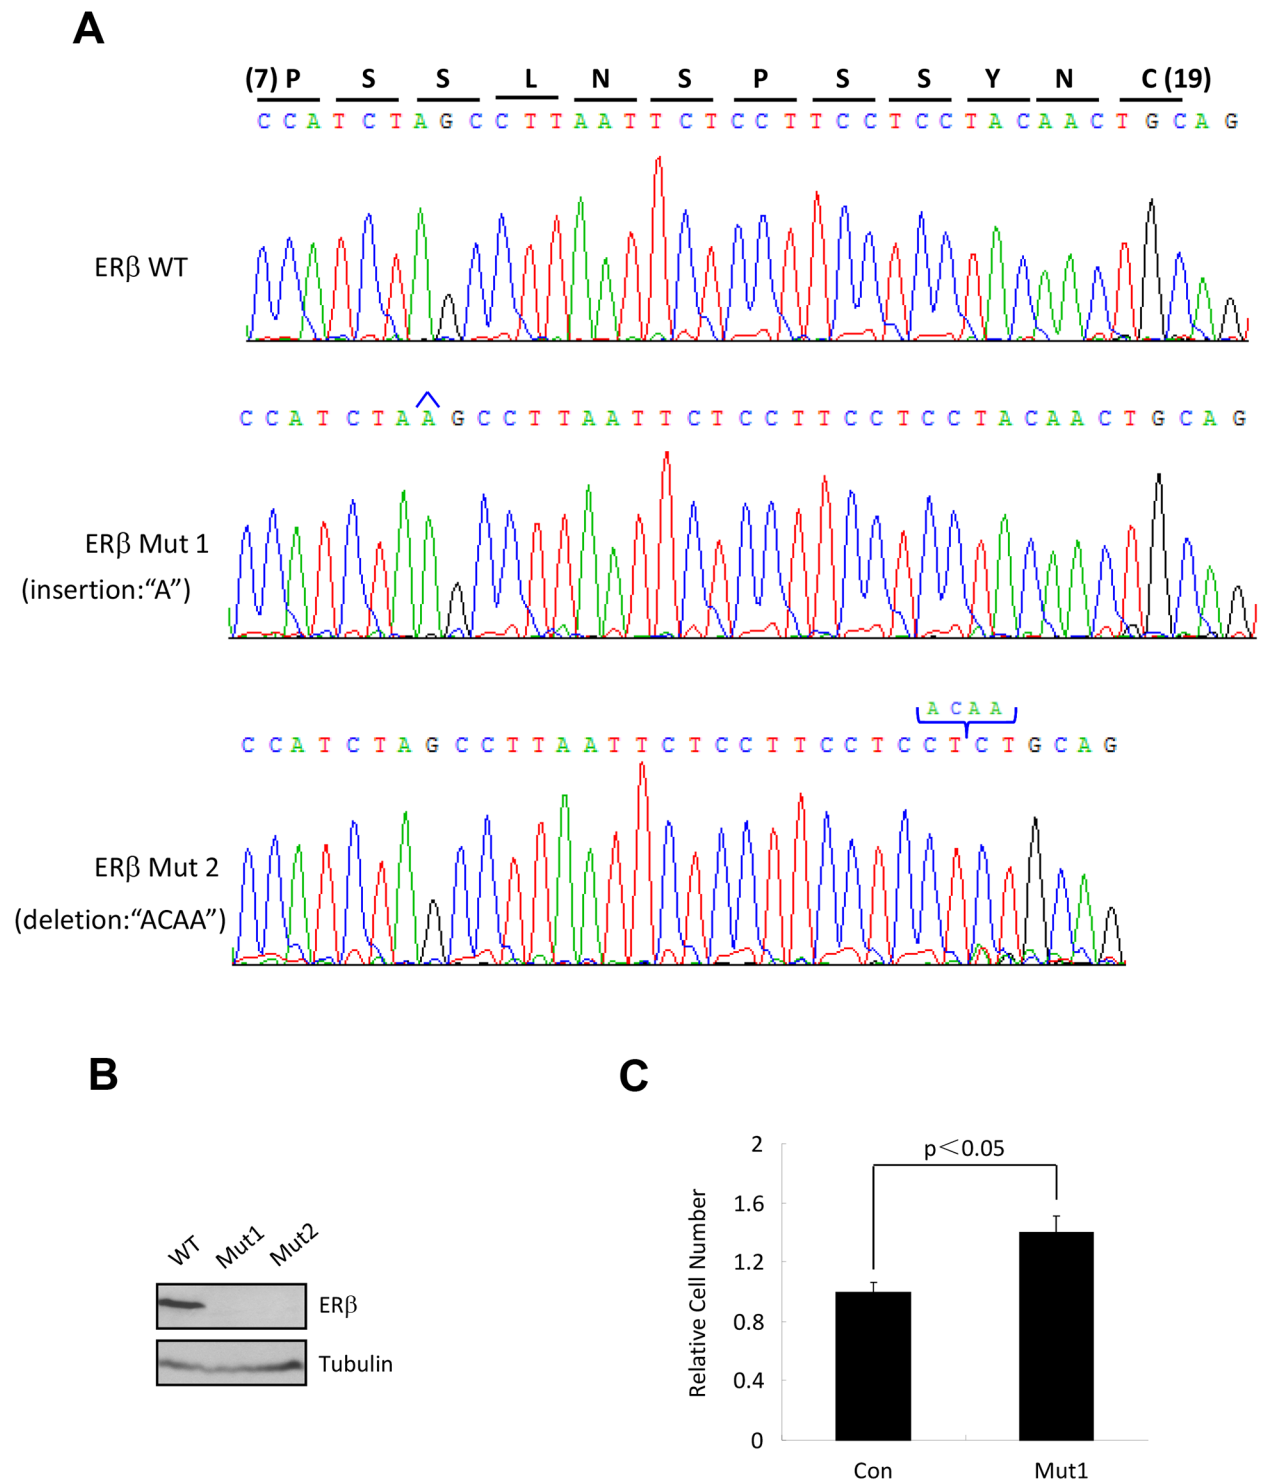

**Supplementary Figure S2: *ESR2* knockout in MDA-MB-231 cells.** **A.** DNA sequences of WT and mutant *ESR2*. **B.** Protein levels of WT and the two mutant cells derived from MDA-MB-231 cells. **C.** MTT-based growth assay for Mut1 cell clone.
